# Supplementary material
Source: MDPI journal article supplement (https://www.mdpi.com/1424-8247/16/2/144)
Supplement: s1 [file s1]

| Studies with<br>intention-to-<br>treat |           |                       |                                           |                      |                               |                                     |         |
|----------------------------------------|-----------|-----------------------|-------------------------------------------|----------------------|-------------------------------|-------------------------------------|---------|
|                                        | Unique ID | Randomization process | Deviations from intended<br>interventions | Missing outcome data | Measurement of the<br>outcome | Selection of the reported<br>result | Overall |
| Pehlivan                               |           |                       |                                           |                      |                               |                                     |         |
| Yip 2008                               |           |                       |                                           |                      |                               |                                     |         |
| Yip 2006                               |           |                       |                                           |                      |                               |                                     |         |

Low risk  
 Some concerns  
 High risk
