# Supplementary material
Source: MDPI journal article supplement (https://www.mdpi.com/1424-8247/16/2/144)
Supplement: s1 [file s1]

| Certainty assessment                                            |                      |                           |              |                      |                  |                               | Summary of findings   |                            |                          |                                          |                                                  |
|-----------------------------------------------------------------|----------------------|---------------------------|--------------|----------------------|------------------|-------------------------------|-----------------------|----------------------------|--------------------------|------------------------------------------|--------------------------------------------------|
| Participants (studies)                                          | Risk of bias         | Inconsistency             | Indirectness | Imprecision          | Publication bias | Overall certainty of evidence | Study event rates (%) |                            | Relative effect (95% CI) | Anticipated absolute effects             |                                                  |
| Follow-up                                                       |                      |                           |              |                      |                  |                               | With placebo          | With essential oil therapy |                          | Risk with placebo                        | Risk difference with essential oil therapy       |
| <b>Pain intensity (assessed with: VAS; Scale from: 0 to 10)</b> |                      |                           |              |                      |                  |                               |                       |                            |                          |                                          |                                                  |
| 443 (7 RCTs)                                                    | serious <sup>a</sup> | very serious <sup>a</sup> | not serious  | not serious          | none             | ⊕○○○<br>Very low              | 222                   | 221                        | -                        | The mean pain intensity was <b>-0.64</b> | MD <b>0.64 lower</b> (0.99 lower to 0.3 lower)   |
| <b>Stiffness (assessed with: VAS; Scale from: 0 to 8)</b>       |                      |                           |              |                      |                  |                               |                       |                            |                          |                                          |                                                  |
| 124 (3 RCTs)                                                    | serious <sup>a</sup> | very serious <sup>a</sup> | not serious  | serious <sup>a</sup> | none             | ⊕○○○<br>Very low              | 64                    | 60                         | -                        | The mean stiffness was <b>-0.77</b>      | MD <b>0.77 lower</b> (1.57 lower to 0.04 higher) |
