# Supplementary material
Source: MDPI journal article supplement (https://www.mdpi.com/1424-8247/16/2/144)
Supplement: s1 [file s1]

Studies with  
intention-to-  
treat

| Clinical trial      | Randomization process | Deviations from<br>intended interventions | Missing outcome data | Measurement of the<br>outcome | Selection of the reported<br>result | Overall |               |
|---------------------|-----------------------|-------------------------------------------|----------------------|-------------------------------|-------------------------------------|---------|---------------|
| Eftekharsadat, 2017 | +                     | ?                                         | +                    | -                             | +                                   | -       | Low risk      |
| Nasiri, 2016        | +                     | ?                                         | +                    | -                             | +                                   | -       | Some concerns |
| Kong, 2012          | +                     | ?                                         | +                    | +                             | ?                                   | !       | High risk     |
| Shirazi, 2017       | +                     | ?                                         | +                    | -                             | +                                   | -       |               |
| Yip, 2008           | +                     | ?                                         | +                    | +                             | ?                                   | !       |               |

A

Studies with  
pre-protocol

| Clinical trial | Randomization process | Deviations from intended | Missing outcome data | Measurement of the outc | Selection of the reported | Overall |               |
|----------------|-----------------------|--------------------------|----------------------|-------------------------|---------------------------|---------|---------------|
| Ou, 2014       | +                     | +                        | +                    | -                       | ?                         | -       | Low risk      |
| Pehlivan, 2019 | +                     | -                        | +                    | -                       | ?                         | -       | Some concerns |
|                |                       |                          |                      |                         |                           |         | High risk     |

B
